# Supplementary material for: Thiol Modulation of the Chloroplast ATP Synthase is Dependent on the Energization of Thylakoid Membranes
Source: Oxford University Press journal article supplement (doi:10.1093/pcp/pcs018), 2012-02-22
Supplement: pcs018_Supplementary_Data.zip [file pcs018_Supplementary_Data.zip]

Archive with 1 entries (1 files):
- pcp-2012-e-00037-File003.pdf
