# Supplementary material for: Thiol Modulation of the Chloroplast ATP Synthase is Dependent on the Energization of Thylakoid Membranes
Source: Oxford University Press journal article supplement (doi:10.1093/pcp/pcs018), 2012-02-22
Supplement: pcs018_Supplementary_Data.zip [file pcs018_Supplementary_Data.zip › pcp-2012-e-00037-File003.pdf]

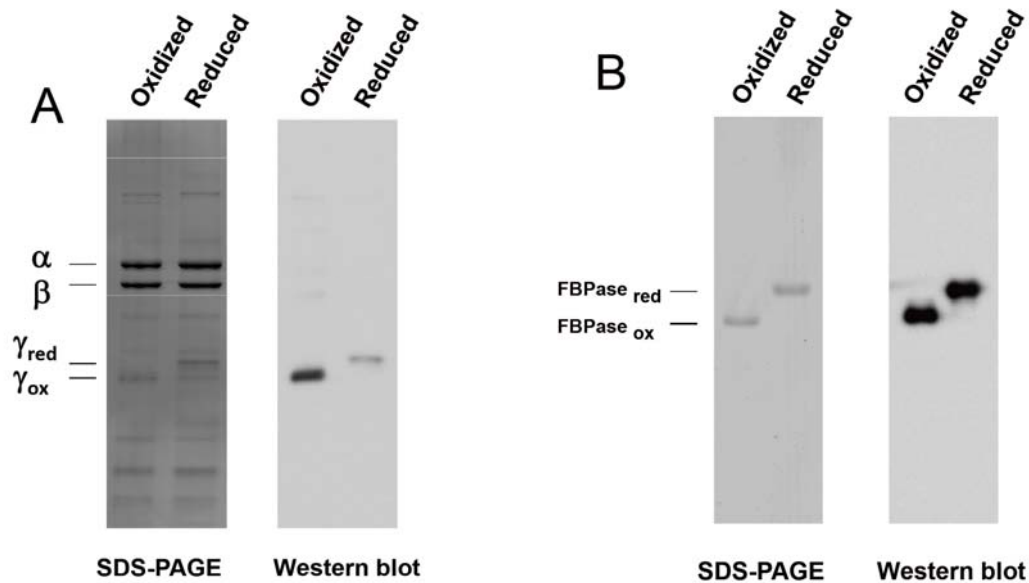

Figure S1. AMS labeling of thiol proteins.

(A) The purified CF<sub>1</sub> was completely oxidized using 50  $\mu$ M diamide or completely reduced with 20 mM DTT and 19  $\mu$ M Trx-*f*. After incubation for 90 min at 25 °C, these additives were removed by gel-filtration chromatography and CF<sub>1</sub> was labeled with AMS. After SDS-PAGE separation, redox level of the  $\gamma$  subunit was visualized and analyzed. The theoretical MW of the spinach ATP synthase  $\gamma$  subunit is 35,786. (B) The purified FBPase was oxidized or reduced as above and labeled with AMS. After SDS-PAGE separation, redox level of FBPase was visualized and analyzed. The theoretical MW of the spinach FBPase is 39,143.

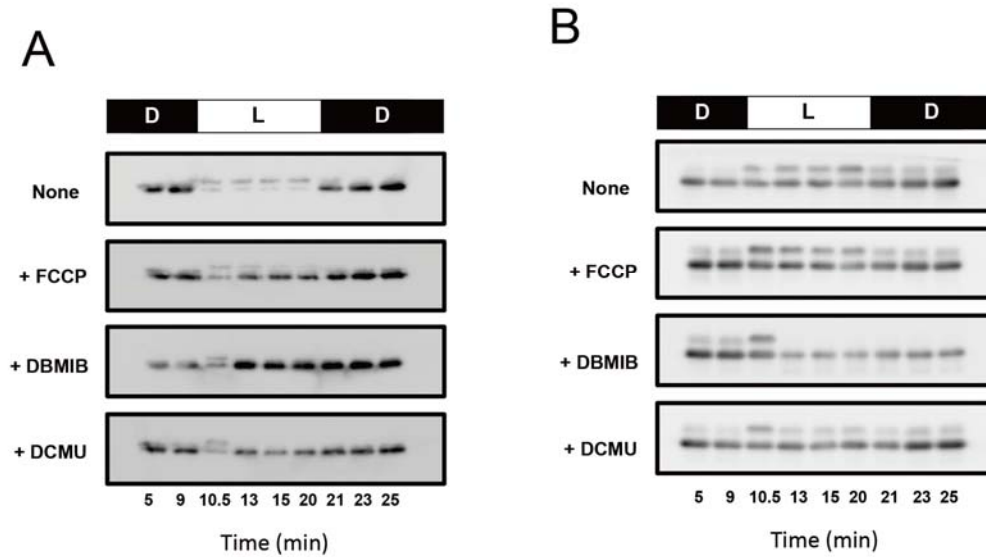

Fig. S2. Effects of inhibitors for photosynthesis on photoreduction of the  $\gamma$  subunit and FBPase.

Following incubation for 10 min in the dark, intact chloroplasts were illuminated at  $800 \mu\text{mol photons} \cdot \text{m}^{-2} \cdot \text{s}^{-1}$  for 10 min and then incubated for an additional 10 min in the dark. 1 min after illumination,  $2.5 \mu\text{M}$  FCCP,  $20 \mu\text{M}$  DBMIB, or  $10 \mu\text{M}$  DCMU were added to the chloroplast solution in the light. At the indicated time, a portion of the chloroplast samples were collected and mixed directly with the thiol group labeling solution containing AMS. The redox levels of the  $\gamma$  subunit and FBPase in the intact chloroplasts were then visualized using the specific antibodies following SDS-PAGE.

**Supplementary Table 1.**

Band intensity ratio of the oxidized and reduced  $\gamma$  subunits

| CF <sub>1</sub> ( $\mu$ g) | Intensity ratio (Ox/Red) |
|----------------------------|--------------------------|
| 4.3                        | 5.5                      |
| 8.6                        | 5.9                      |
| 17.2                       | 5.2                      |
| 34.4                       | 5.5                      |
| Average                    | 5.53                     |

Band intensity ratio of the oxidized and reduced  $\gamma$  subunits shown in Fig. S1A were determined using the various concentrations of CF<sub>1</sub>.
